# Supplementary material for: Research Status Quo in Traditional Mongolian Medicine: A Bibliometric Analysis on Research Documents in the Web of Science Database
Source: Hindawi journal article supplement (doi:10.1155/2021/5088129), 2021-12-28

**Supplementary file 1. Summary of the included research literature between 1991 and 2021**

| <b>Items</b>                                  | <b>Main information data<br/>(Total number of documents: 234)</b> |
|-----------------------------------------------|-------------------------------------------------------------------|
| Average time duration from publication (mean) | 5.68 years                                                        |
| Average numbers of citation per document      | 6.363                                                             |
| Total number of the references                | 6426                                                              |
| Document types                                |                                                                   |
| <i>Article</i>                                | 202                                                               |
| <i>Editorial material</i>                     | 2                                                                 |
| <i>Meeting abstract</i>                       | 13                                                                |
| <i>Note</i>                                   | 1                                                                 |
| <i>Review</i>                                 | 11                                                                |
| Number of all the authors                     | 1050                                                              |
| Number of author's keywords                   | 824                                                               |
| Number of the co-authors per documents        | 6.28                                                              |
| Collaboration index                           | 4.64                                                              |

**Supplementary file 2. changes in the number of publications by year**

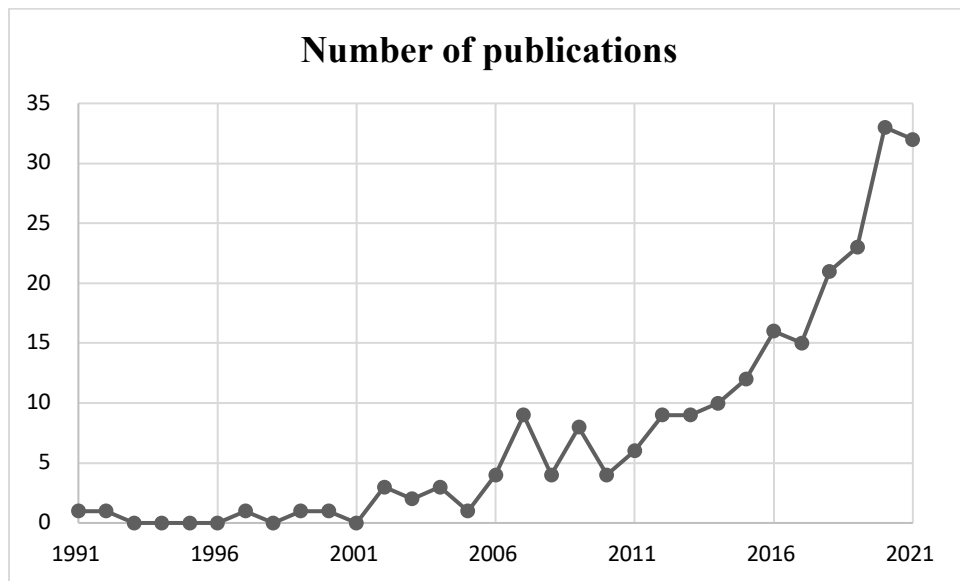

Supplementary file 3. Average total article citations per year

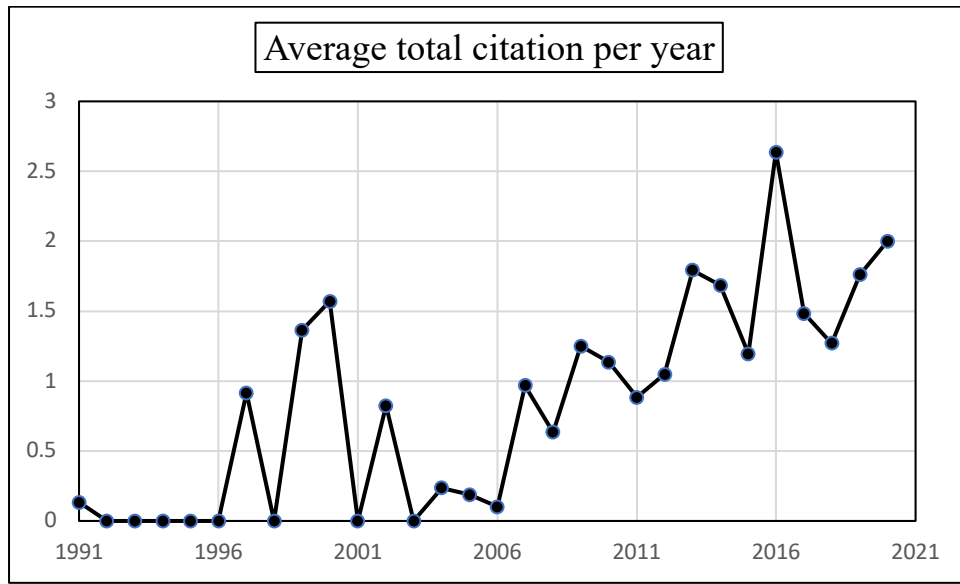

**Supplementary file 4. Most active authors (top 20)**

| <b>Authors</b> | <b>Articles</b> |
|----------------|-----------------|
| WANG QH        | 19              |
| BATKHUU J      | 11              |
| BAO LD         | 9               |
| GLASL S        | 9               |
| PUREVSUREN S   | 8               |
| BO A           | 7               |
| KLETTER C      | 7               |
| LI MH          | 7               |
| MURATA T       | 7               |
| NARANTUYA S    | 7               |
| SI LG          | 7               |
| TU PF          | 7               |
| AO WLJ         | 6               |
| CHAI XY        | 6               |
| OBMANN A       | 6               |
| XUE PF         | 6               |
| ZEHL M         | 6               |
| BU R           | 5               |
| KOMATSU K      | 5               |
| LU JK          | 5               |

**Supplementary file 5. Most relevant journal lists (top 20)**

| <b>Sources</b>                                        | <b>Articles</b> |
|-------------------------------------------------------|-----------------|
| JOURNAL OF ETHNOPHARMACOLOGY                          | 24              |
| SPECTROSCOPY AND SPECTRAL ANALYSIS                    | 16              |
| NATURAL PRODUCT RESEARCH                              | 15              |
| JOURNAL OF NATURAL MEDICINES                          | 8               |
| EVIDENCE-BASED COMPLEMENTARY AND ALTERNATIVE MEDICINE | 6               |
| PLANTA MEDICA                                         | 6               |
| CHEMICAL & PHARMACEUTICAL BULLETIN                    | 4               |
| MOLECULES                                             | 4               |
| SCIENTIFIC REPORTS                                    | 4               |
| ACTA PHARMACOLOGICA SINICA                            | 3               |
| CHEMISTRY OF NATURAL COMPOUNDS                        | 3               |
| CHINESE JOURNAL OF NATURAL MEDICINES                  | 3               |
| HERALD OF AN ARCHIVIST                                | 3               |
| JOURNAL OF NATURAL PRODUCTS                           | 3               |
| JOURNAL OF SEPARATION SCIENCE                         | 3               |
| JOURNAL OF TRADITIONAL CHINESE MEDICINE               | 3               |
| PHARMACEUTICAL BIOLOGY                                | 3               |
| PHYTOCHEMISTRY                                        | 3               |
| PHYTOCHEMISTRY LETTERS                                | 3               |
| BASIC & CLINICAL PHARMACOLOGY & TOXICOLOGY            | 2               |

## Supplementary file 6. Most global cited documents

| Document information               | DOI                                                                                                                                                                                      | Total Citations |
|------------------------------------|------------------------------------------------------------------------------------------------------------------------------------------------------------------------------------------|-----------------|
| WANG YZ, 2013, INT IMMUNOPHARMACOL | Protective effects of probiotic <i>Lactobacillus casei</i> Zhang against endotoxin- and d-galactosamine-induced liver injury in rats via anti-oxidative and anti-inflammatory capacities | 61              |
| BONDIA-PONS I, 2014, FOOD RES INT  | Metabolic profiling of Goji berry extracts for discrimination of geographical origin by non-targeted liquid chromatography coupled to quadrupole time-of-flight mass spectrometry        | 58              |
| MENG QX, 2009, J ETHNOPHARMACOL    | Ethnobotany, phytochemistry and pharmacology of the genus <i>Caragana</i> used in traditional Chinese medicine                                                                           | 58              |
| MENG XX, 2016, J ETHNOPHARMACOL    | Chemical composition, antibacterial activity and related mechanism of the essential oil from the leaves of <i>Juniperus rigida</i> Sieb. et Zucc against <i>Klebsiella pneumoniae</i>    | 47              |
| TSEVEGSUREN N, 2007, J NAT PROD    | Biologically Active Natural Products from Mongolian Medicinal Plants <i>Scorzonera divaricata</i> and <i>Scorzonera pseudodivaricata</i>                                                 | 46              |
| BAO B, 2007, MAR DRUGS             | Monoindole Alkaloids from a Marine Sponge <i>Spongisorites</i> sp.                                                                                                                       | 36              |
| CHIK WI, 2015, J ETHNOPHARMACOL    | <i>Saussurea involucrata</i> : A review of the botany, phytochemistry and ethnopharmacology of a rare traditional herbal medicine                                                        | 35              |
| KOJIMA K, 2000, CHEM PHARM BULL    | Sesquiterpenoid derivatives from <i>Ferula feruloides</i> . IV                                                                                                                           | 33              |
| TANAKA K, 2008, PHYTOCHEMISTRY     | Quality evaluation of <i>Astragali Radix</i> using a multivariate statistical approach                                                                                                   | 33              |
| KOJIMA K, 1999, CHEM PHARM BULL    | Sesquiterpenoid derivatives from <i>Ferula feruloides</i> . III                                                                                                                          | 30              |
| LI YJ, 2016, NEUROSCI LETT         | <i>Xanthoceras sorbifolia</i> extracts ameliorate dendritic spine deficiency and cognitive decline via upregulation of BDNF expression in a rat model of Alzheimer's disease             | 28              |
| MA CM, 2002, PHYTOTHER RES         | Screening of Chinese and Mongolian herbal drugs for anti-human immunodeficiency virus type 1 (HIV-1) activity                                                                            | 26              |
| ZHANG W, 2017, FOOD FUNCT          | Seabuckthorn berry polysaccharide protects against carbon tetrachloride-induced hepatotoxicity in mice via anti-oxidative and anti-inflammatory activities                               | 26              |
| ROEDER E, 2009, PHARMAZIE          | Pyrolizidine alkaloids in medicinal plants of Mongolia, Nepal and Tibet                                                                                                                  | 25              |
| SCHMIDT S, 2013, J ETHNOPHARMACOL  | Extracts from <i>Leonurus sibiricus</i> L. increase insulin secretion and proliferation of rat INS-1E insulinoma cells                                                                   | 23              |
| CAO Y, 2016, J ETHNOPHARMACOL      | Anti-myocardial ischemia effect of <i>Syringa pinnatifolia</i> Hemsl. by inhibiting expression of cyclooxygenase-1 and -2 in myocardial tissues of mice                                  | 22              |

|                                   |                                                                                                                                                                                |    |
|-----------------------------------|--------------------------------------------------------------------------------------------------------------------------------------------------------------------------------|----|
| KOJIMA K, 1997,<br>PHYTOCHEMISTRY | Flavanones from <i>Iris tenuifolia</i>                                                                                                                                         | 22 |
| LI MX, 2009, PHYTOTHER<br>RES     | Isolation and identification of hemostatic ingredients<br>from <i>Lamiophlomis rotata</i> (Benth.) Kudo                                                                        | 22 |
| BADRAL D, 2017, J NAT<br>PROD     | Flavonoid and Galloyl Glycosides Isolated<br>from <i>Saxifraga spinulosa</i> and Their Antioxidative and<br>Inhibitory Activities against Species That Cause<br>Piroplasmiasis | 18 |
| SONG SA, 2010, CHEM<br>PHARM BULL | 3-Hydroxymethylglutaryl Flavonol Glycosides from<br>a Mongolian and Tibetan Medicine, <i>Oxytropis</i><br><i>racemosa</i>                                                      | 18 |

Supplementary file 7. co-occurrence network of keywords.

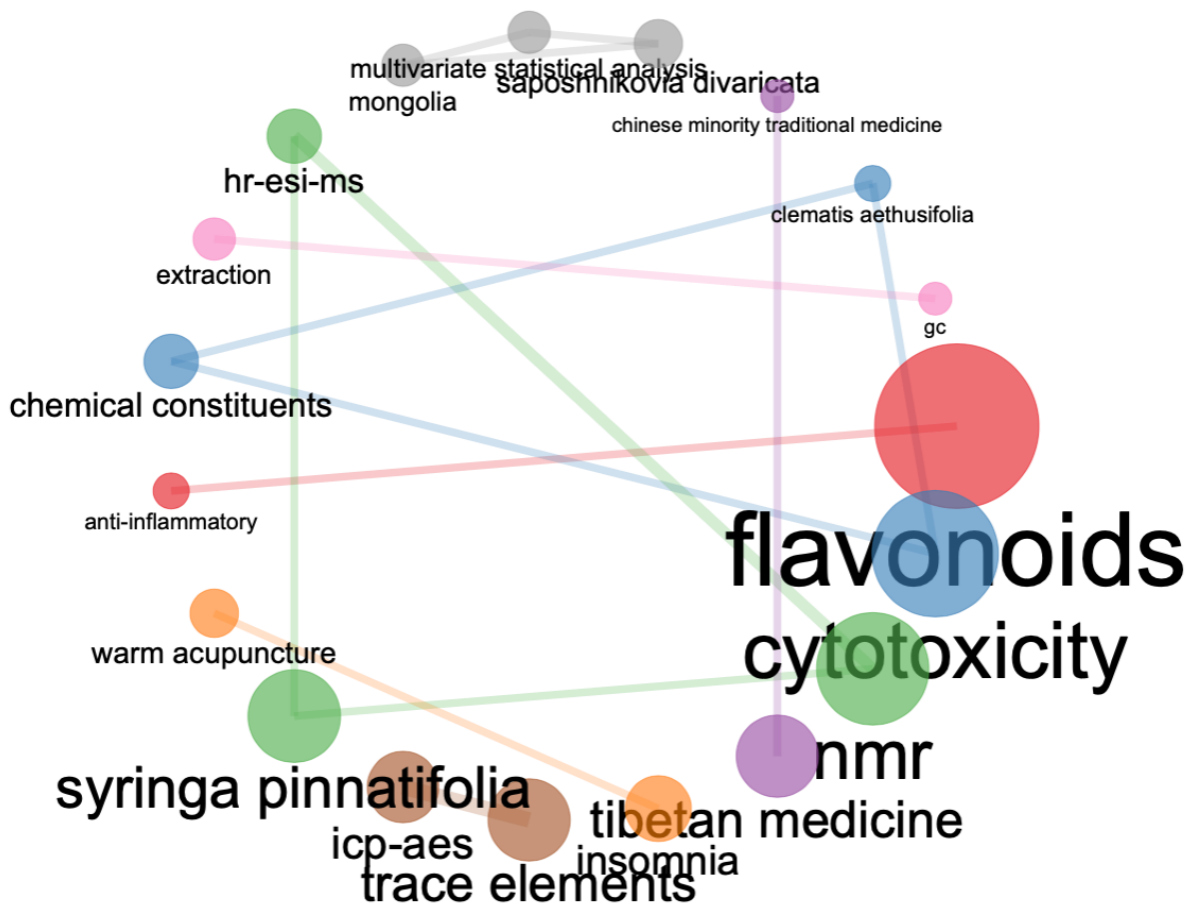



**Supplementary file 8. Collaboration network of the authors in the literatures**

| <b>Node</b>      | <b>Cluster</b> | <b>Betweenness centrality</b> | <b>Closeness centrality</b> |
|------------------|----------------|-------------------------------|-----------------------------|
| GLASL S          | 1              | 0                             | 0.000659196                 |
| PUREVSUREN S     | 1              | 0                             | 0.000659196                 |
| KLETTER C        | 1              | 0                             | 0.000659196                 |
| NARANTUYA S      | 1              | 0                             | 0.000659196                 |
| OBMANN A         | 1              | 0                             | 0.000659196                 |
| ZEHL M           | 1              | 0                             | 0.000659196                 |
| BAO LD           | 2              | 1.728571429                   | 0.000677048                 |
| BO A             | 2              | 0                             | 0.00067659                  |
| SI LG            | 2              | 2.271428571                   | 0.000677048                 |
| YUAN HW          | 2              | 5                             | 0.000677048                 |
| SU XL            | 2              | 0                             | 0.000674764                 |
| WANG YH          | 2              | 0                             | 0.00067659                  |
| CHEN YS          | 2              | 0                             | 0.000675219                 |
| BATKHUU J        | 3              | 4                             | 0.000659196                 |
| MURATA T         | 3              | 0                             | 0.000658762                 |
| KOMATSU K        | 3              | 0                             | 0.000657462                 |
| SASAKI K         | 3              | 0                             | 0.000658762                 |
| SUGANUMA K       | 3              | 0                             | 0.000658762                 |
| BANZRAGCHGARAV O | 3              | 0                             | 0.000658762                 |
| TU PF            | 4              | 0.321428571                   | 0.000659196                 |
| CHAI XY          | 4              | 0.321428571                   | 0.000659196                 |
| ZHANG RF         | 4              | 0.214285714                   | 0.000659196                 |
| CAO Y            | 4              | 0.142857143                   | 0.000659196                 |
| FENG X           | 4              | 0                             | 0.000658762                 |
| GAO XL           | 4              | 0                             | 0.000658762                 |
| XUE PF           | 5              | 0                             | 0.000641849                 |
| BU R             | 5              | 0                             | 0.000641849                 |
| LU JK            | 5              | 0                             | 0.000641849                 |
| DONG X           | 5              | 0                             | 0.000641849                 |
| MA FX            | 5              | 0                             | 0.000641849                 |
| WANG QH          | 6              | 17                            | 0.000696864                 |
| AO WLJ           | 6              | 0                             | 0.000694444                 |
| BAO WQ           | 6              | 0                             | 0.000694927                 |
| HAN JJ           | 6              | 0                             | 0.000693963                 |
| PA B             | 6              | 0                             | 0.000694927                 |
| XU YH            | 6              | 0                             | 0.000694927                 |
| BAO XH           | 6              | 0                             | 0.000694444                 |
| HAO JS           | 6              | 0                             | 0.000693963                 |
| BORJIGIDAI A     | 7              | 0                             | 0.000594884                 |
| CUI J            | 7              | 0                             | 0.000594884                 |
| BA T             | 8              | 0                             | 0.000594884                 |

**Supplementary file 9. Collaboration network of the institutions in the literatures**

| Node                                      | Cluster | Betweenness | Closeness   |
|-------------------------------------------|---------|-------------|-------------|
| UNIV VIENNA                               | 1       | 0           | 0.00094697  |
| HLTH SCI UNIV MONGOLIA                    | 1       | 0           | 0.00094697  |
| MED UNIV VIENNA                           | 1       | 0           | 0.00094697  |
| INNER MONGOLIA MED UNIV                   | 2       | 66          | 0.001550388 |
| INNER MONGOLIA UNIV NATIONALITES          | 2       | 38          | 0.001533742 |
| MINZU UNIV CHINA                          | 2       | 14          | 0.001506024 |
| BEIJING UNIV CHINESE MED                  | 2       | 14          | 0.00152207  |
| JILIN UNIV                                | 2       | 0           | 0.001501502 |
| PEKING UNIV                               | 2       | 56          | 0.001550388 |
| INNER MONGOLIA INT MONGOLIAN HOSP         | 2       | 0           | 0.001526718 |
| ALASHAN MONGOLIAN HOSPITAL                | 2       | 0           | 0.001490313 |
| INST CHINESE MAT MED                      | 2       | 0           | 0.001474926 |
| NATL UNIV MONGOLIA                        | 3       | 61.19920635 | 0.001545595 |
| OBIHIRO UNIV AGR AND VET MED              | 3       | 1.467460317 | 0.00152207  |
| INST CHEM AND TECHNOL                     | 3       | 0           | 0.001517451 |
| TOHOKU MED AND PHARMACEUT UNIV            | 3       | 0.333333333 | 0.001519757 |
| MONGOLIAN UNIV LIFE SCI                   | 3       | 0           | 0.001515152 |
| TOYAMA UNIV                               | 3       | 0           | 0.001512859 |
| MONGOLIAN UNIV PHARMACEUT SCI             | 3       | 0           | 0.001517451 |
| BAOTOU MED COLL                           | 4       | 0           | 0.000918274 |
| INNER MONGOLIA INST TRADIT CHINESE MED    | 4       | 0           | 0.000918274 |
| INNER MONGOLIA AGR UNIV                   | 5       | 0           | 0.000918274 |
| INNER MONGOLIA PEOPLES HOSP               | 5       | 0           | 0.000918274 |
| INNER MONGOLIA NORMAL UNIV                | 6       | 0           | 0.000918274 |
| CHINESE AND MONGOLIAN HOSP INNER MONGOLIA | 6       | 0           | 0.000918274 |
| INNER MONGOLIA UNIV                       | 7       | 0           | 0.000918274 |
| INT HOSP MONGOLIAN MED                    | 7       | 0           | 0.000918274 |
| MONGOLIAN PHARMACEUT PREPARAT CTR         | 8       | 0           | 0.00094697  |
| MONGOLIAN MED INST INNER MONGOLIA         | 8       | 0           | 0.00094697  |
| STATE CLIN TRIAL INST NEW DRUGS           | 8       | 0           | 0.00094697  |
| INST CHEM                                 | 9       | 0           | 0.000918274 |

Supplementary file 10. Collaboration network between countries

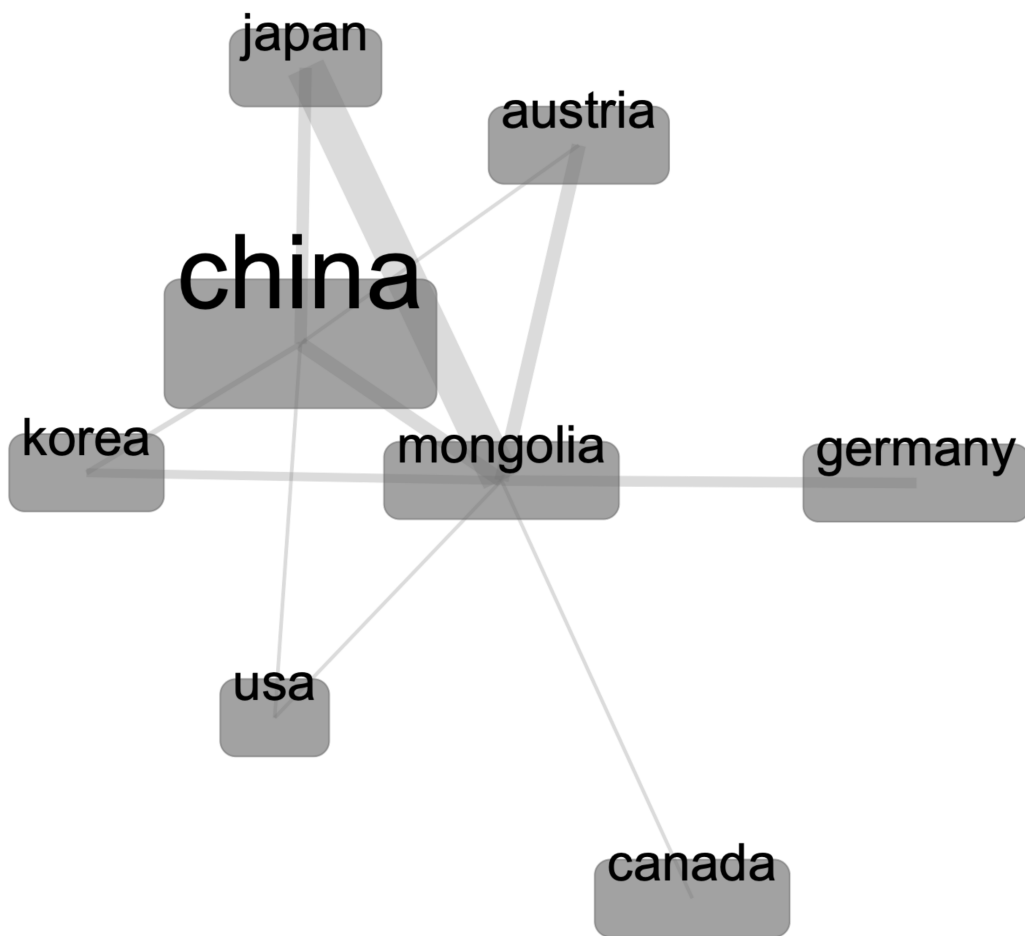

Supplement: f1 [file 5088129.f1.pdf]
